# Supplementary material for: A data-driven interpretable method to predict capacities of metal ion doped TiO2 anode materials for lithium-ion batteries using machine learning classifiers
Source: Royal Society of Chemistry journal article supplement (doi:10.1039/d3qi01705b), 2023-01-01
Supplement: d3qi01705b1.pdf [file d3qi01705b1.pdf]

## Electronic Supplementary Information

### A Data-driven Interpretable Method to Predict Capacities of Metal ion Doped TiO<sub>2</sub> Anode Materials for Lithium-ion Batteries Using Machine Learning Classifiers

Mingxi Jiang <sup>a</sup>, Yajuan Zhang <sup>a</sup>, Zihao Yang <sup>a</sup>, Haibo Li <sup>b</sup>, Jinliang Li <sup>c</sup>, Jiabao Li <sup>d</sup>, Ting Lu <sup>a</sup>,

Chenglong Wang <sup>a,\*</sup>, Guang Yang <sup>a,\*</sup>, Likun Pan <sup>a,\*</sup>

<sup>a</sup> Shanghai Key Laboratory of Magnetic Resonance, School of Physics and Electronic Science, East China Normal University, Shanghai 200241, China

<sup>b</sup> Ningxia Key Laboratory of Photovoltaic Materials, School of Materials and New Energy, Ningxia University, Yinchuan 750021, China

<sup>c</sup> Siyuan Laboratory, Guangdong Provincial Engineering Technology Research Center of Vacuum Coating Technologies and New Energy Materials, Department of Physics, Jinan University, Guangzhou 510632, China

<sup>d</sup> School of Chemistry and Chemical Engineering, Yangzhou University, Yangzhou, Jiangsu 225002, China

\*Corresponding authors

E-mail addresses: [lkpan@phy.ecnu.edu.cn](mailto:lkpan@phy.ecnu.edu.cn) (Likun Pan); [clwang@phy.ecnu.edu.cn](mailto:clwang@phy.ecnu.edu.cn) (Chenglong

Wang); [gyang@phy.ecnu.edu.cn](mailto:gyang@phy.ecnu.edu.cn) (Guang Yang)

**Supplementary Table S1.** Datasets: electronegativity of the doped elements (en), atom ratio of dopant and Ti (ratio), dopant's ionic radius (radius), state of the dopant (state), material molecule mass (Mweight), molecule single bond covalent radius (rc), bond formation enthalpy of doped element and oxygen (feo), current density (current), lowest potential during charging and discharging (low), highest potential during charging and discharging (high), capacity values at different current densities (capacity).

| elements | en   | ratio | radius (nm) | state | rc<br>(nm) | feo (KJ) | Mweight | low (V) | high (V) | current (A/<br>g) | capacity (mAh/g) | Ref |
|----------|------|-------|-------------|-------|------------|----------|---------|---------|----------|-------------------|------------------|-----|
| Mg       | 1.31 | 0.02  | 0.072       | 2     | 1.39       | 601.6    | 79.428  | 0.8     | 2.8      | 0.0167            | 160              | 1   |
| Mg       | 1.31 | 0.02  | 0.072       | 2     | 1.39       | 601.6    | 79.428  | 0.8     | 2.8      | 0.084             | 155              | 1   |
| Mg       | 1.31 | 0.02  | 0.072       | 2     | 1.39       | 601.6    | 79.428  | 0.8     | 2.8      | 0.167             | 140              | 1   |
| Mg       | 1.31 | 0.02  | 0.072       | 2     | 1.39       | 601.6    | 79.428  | 0.8     | 2.8      | 0.335             | 123              | 1   |
| Mg       | 1.31 | 0.02  | 0.072       | 2     | 1.39       | 601.6    | 79.428  | 0.8     | 2.8      | 0.835             | 95               | 1   |
| Mg       | 1.31 | 0.01  | 0.072       | 2     | 1.39       | 601.6    | 79.664  | 0.8     | 2.8      | 0.0167            | 163              | 1   |
| Mg       | 1.31 | 0.01  | 0.072       | 2     | 1.39       | 601.6    | 79.664  | 0.8     | 2.8      | 0.084             | 152              | 1   |
| Mg       | 1.31 | 0.01  | 0.072       | 2     | 1.39       | 601.6    | 79.664  | 0.8     | 2.8      | 0.167             | 136              | 1   |
| Mg       | 1.31 | 0.01  | 0.072       | 2     | 1.39       | 601.6    | 79.664  | 0.8     | 2.8      | 0.335             | 115d             | 1   |
| Mg       | 1.31 | 0.01  | 0.072       | 2     | 1.39       | 601.6    | 79.664  | 0.8     | 2.8      | 0.835             | 80               | 1   |
| Mg       | 1.31 | 0.04  | 0.072       | 2     | 1.39       | 601.6    | 78.956  | 0.8     | 2.8      | 0.0167            | 159              | 1   |
| Mg       | 1.31 | 0.04  | 0.072       | 2     | 1.39       | 601.6    | 78.956  | 0.8     | 2.8      | 0.084             | 139              | 1   |
| Mg       | 1.31 | 0.04  | 0.072       | 2     | 1.39       | 601.6    | 78.956  | 0.8     | 2.8      | 0.167             | 110              | 1   |
| Mg       | 1.31 | 0.04  | 0.072       | 2     | 1.39       | 601.6    | 78.956  | 0.8     | 2.8      | 0.335             | 82               | 1   |
| Mg       | 1.31 | 0.04  | 0.072       | 2     | 1.39       | 601.6    | 78.956  | 0.8     | 2.8      | 0.835             | 50               | 1   |
| Sn       | 1.96 | 0.03  | 0.069       | 4     | 1.4        | 290.4    | 82.024  | 1       | 3        | 0.0167            | 266              | 2   |
| Sn       | 1.96 | 0.05  | 0.069       | 4     | 1.4        | 290.4    | 83.44   | 1       | 3        | 0.0167            | 342              | 2   |
| Sn       | 1.96 | 0.05  | 0.069       | 4     | 1.4        | 290.4    | 83.44   | 1       | 3        | 0.0335            | 325              | 2   |
| Sn       | 1.96 | 0.05  | 0.069       | 4     | 1.4        | 290.4    | 83.44   | 1       | 3        | 0.167             | 295              | 2   |
| Sn       | 1.96 | 0.05  | 0.069       | 4     | 1.4        | 290.4    | 83.44   | 1       | 3        | 0.335             | 260              | 2   |
| Sn       | 1.96 | 0.05  | 0.069       | 4     | 1.4        | 290.4    | 83.44   | 1       | 3        | 0.835             | 206              | 2   |
| Sn       | 1.96 | 0.07  | 0.069       | 4     | 1.4        | 290.4    | 84.856  | 1       | 3        | 0.0167            | 207              | 2   |
| Nb       | 1.6  | 0.25  | 0.064       | 5     | 1.47       | 379.9    | 91.15   | 1.2     | 3        | 0.5               | 162              | 3   |
| Nb       | 1.6  | 0.25  | 0.064       | 5     | 1.47       | 379.9    | 91.15   | 1.2     | 3        | 2                 | 136              | 3   |
| Nb       | 1.6  | 0.25  | 0.064       | 5     | 1.47       | 379.9    | 91.15   | 1.2     | 3        | 5                 | 100              | 3   |
| Nb       | 1.6  | 0.25  | 0.064       | 5     | 1.47       | 379.9    | 91.15   | 1.2     | 3        | 0.1               | 180              | 3   |

|           |      |        |        |   |      |       |         |      |   |        |     |    |
|-----------|------|--------|--------|---|------|-------|---------|------|---|--------|-----|----|
| <b>Nb</b> | 1.6  | 0.25   | 0.064  | 5 | 1.47 | 379.9 | 91.15   | 1.2  | 3 | 1      | 150 | 3  |
| <b>Nb</b> | 1.6  | 0.25   | 0.064  | 5 | 1.47 | 379.9 | 91.15   | 1.2  | 3 | 10     | 75  | 3  |
| <b>Sn</b> | 1.96 | 0.1    | 0.069  | 4 | 1.47 | 290.4 | 86.98   | 0.1  | 3 | 0.1    | 300 | 4  |
| <b>Sn</b> | 1.96 | 0.1    | 0.069  | 4 | 1.47 | 290.4 | 86.98   | 0.1  | 3 | 0.3    | 240 | 4  |
| <b>Sn</b> | 1.96 | 0.1    | 0.069  | 4 | 1.47 | 290.4 | 86.98   | 0.1  | 3 | 0.5    | 195 | 4  |
| <b>Sn</b> | 1.96 | 0.1    | 0.069  | 4 | 1.47 | 290.4 | 86.98   | 0.1  | 3 | 1      | 150 | 4  |
| <b>Fe</b> | 1.83 | NAN    | 0.0645 | 3 | 1.16 | 549.5 | 80.46   | 0.01 | 3 | 0.335  | 160 | 5  |
| <b>Fe</b> | 1.83 | NAN    | 0.0645 | 3 | 1.16 | 549.5 | 80.46   | 0.01 | 3 | 0.67   | 123 | 5  |
| <b>Fe</b> | 1.83 | NAN    | 0.0645 | 3 | 1.16 | 549.5 | 80.46   | 0.01 | 3 | 1      | 123 | 5  |
| <b>Fe</b> | 1.83 | NAN    | 0.0645 | 3 | 1.16 | 549.5 | 80.46   | 0.01 | 3 | 1.67   | 103 | 5  |
| <b>Fe</b> | 1.83 | NAN    | 0.0645 | 3 | 1.16 | 549.5 | 80.46   | 0.01 | 3 | 3.35   | 75  | 5  |
| <b>Fe</b> | 1.83 | NAN    | 0.0645 | 3 | 1.16 | 549.5 | 80.46   | 0.01 | 3 | 6.7    | 58  | 5  |
| <b>Ti</b> | 1.54 | 0.05   | 0.067  | 3 | 1.36 | 1012  | 79.9    | 1    | 3 | 0.17   | 195 | 6  |
| <b>Ti</b> | 1.54 | 0.05   | 0.067  | 3 | 1.36 | 1012  | 79.9    | 1    | 3 | 1.7    | 103 | 6  |
| <b>Ti</b> | 1.54 | 0.05   | 0.067  | 3 | 1.36 | 1012  | 79.9    | 1    | 3 | 6.8    | 50  | 6  |
| <b>Nb</b> | 1.6  | 0.04   | 0.069  | 5 | 1.47 | 379.9 | 81.7    | 0.5  | 3 | 0.25   | 296 | 7  |
| <b>Nb</b> | 1.6  | 0.04   | 0.069  | 5 | 1.47 | 379.9 | 81.7    | 0.5  | 3 | 1      | 237 | 7  |
| <b>Nb</b> | 1.6  | 0.04   | 0.069  | 5 | 1.47 | 379.9 | 81.7    | 0.5  | 3 | 0.05   | 360 | 7  |
| <b>Nb</b> | 1.6  | 0.04   | 0.069  | 5 | 1.47 | 379.9 | 81.7    | 0.5  | 3 | 0.5    | 265 | 7  |
| <b>Ni</b> | 1.91 | 0.0245 | 0.069  | 2 | 1.1  | 239.7 | 80.1646 | 0.05 | 3 | 0.1    | 145 | 8  |
| <b>Ni</b> | 1.91 | 0.0245 | 0.069  | 2 | 1.1  | 239.7 | 80.1646 | 0.05 | 3 | 1      | 82  | 8  |
| <b>Ni</b> | 1.91 | 0.0245 | 0.069  | 2 | 1.1  | 239.7 | 80.1646 | 0.05 | 3 | 0.04   | 185 | 8  |
| <b>Ni</b> | 1.91 | 0.0245 | 0.069  | 2 | 1.1  | 239.7 | 80.1646 | 0.05 | 3 | 0.2    | 100 | 8  |
| <b>Ni</b> | 1.91 | 0.0245 | 0.069  | 2 | 1.1  | 239.7 | 80.1646 | 0.05 | 3 | 0.4    | 80  | 8  |
| <b>Ni</b> | 1.91 | 0.008  | 0.069  | 2 | 1.1  | 239.7 | 79.9864 | 0.05 | 3 | 0.1    | 105 | 8  |
| <b>Ni</b> | 1.91 | 0.008  | 0.069  | 2 | 1.1  | 239.7 | 79.9864 | 0.05 | 3 | 1      | 45  | 8  |
| <b>Ni</b> | 1.91 | 0.008  | 0.069  | 2 | 1.1  | 239.7 | 79.9864 | 0.05 | 3 | 0.04   | 150 | 8  |
| <b>Ni</b> | 1.91 | 0.008  | 0.069  | 2 | 1.1  | 239.7 | 79.9864 | 0.05 | 3 | 0.2    | 90  | 8  |
| <b>Ni</b> | 1.91 | 0.008  | 0.069  | 2 | 1.1  | 239.7 | 79.9864 | 0.05 | 3 | 0.4    | 60  | 8  |
| <b>Mn</b> | 1.55 | 0.1    | 0.054  | 4 | 1.19 | 519.7 | 80.6    | 1    | 3 | 0.0167 | 130 | 9  |
| <b>Mn</b> | 1.55 | 0.1    | 0.054  | 4 | 1.19 | 519.7 | 80.6    | 1    | 3 | 0.084  | 110 | 9  |
| <b>Mn</b> | 1.55 | 0.1    | 0.054  | 4 | 1.19 | 519.7 | 80.6    | 1    | 3 | 0.335  | 60  | 9  |
| <b>Mn</b> | 1.55 | 0.2    | 0.054  | 4 | 1.19 | 519.7 | 81.3    | 1    | 3 | 0.0167 | 123 | 9  |
| <b>Mn</b> | 1.55 | 0.2    | 0.054  | 4 | 1.19 | 519.7 | 81.3    | 1    | 3 | 0.084  | 100 | 9  |
| <b>Mn</b> | 1.55 | 0.2    | 0.054  | 4 | 1.19 | 519.7 | 81.3    | 1    | 3 | 0.335  | 42  | 9  |
| <b>Sn</b> | 1.96 | 0.06   | 0.069  | 4 | 1.4  | 290.4 | 84.148  | 0.01 | 3 | 0.084  | 270 | 10 |
| <b>Sn</b> | 1.96 | 0.06   | 0.069  | 4 | 1.4  | 290.4 | 84.148  | 0.01 | 3 | 0.167  | 180 | 10 |
| <b>Sn</b> | 1.96 | 0.06   | 0.069  | 4 | 1.4  | 290.4 | 84.148  | 0.01 | 3 | 0.0167 | 300 | 10 |
| <b>Sn</b> | 1.96 | 0.06   | 0.069  | 4 | 1.4  | 290.4 | 84.148  | 0.01 | 3 | 0.0335 | 240 | 10 |

|           |      |        |        |   |      |       |          |      |     |        |     |    |
|-----------|------|--------|--------|---|------|-------|----------|------|-----|--------|-----|----|
| <b>Mn</b> | 1.55 | 0.05   | 0.054  | 4 | 1.19 | 519.7 | 80.25    | 1    | 3   | 0.0167 | 190 | 9  |
| <b>Mn</b> | 1.55 | 0.05   | 0.054  | 4 | 1.19 | 519.7 | 80.25    | 1    | 3   | 0.084  | 165 | 9  |
| <b>Mn</b> | 1.55 | 0.05   | 0.054  | 4 | 1.19 | 519.7 | 80.25    | 1    | 3   | 0.335  | 125 | 9  |
| <b>Cu</b> | 1.9  | 0.0355 | 0.073  | 2 | 1.12 | 157.3 | 80.45735 | 1    | 3.2 | 0.335  | 170 | 11 |
| <b>Cu</b> | 1.9  | 0.0355 | 0.073  | 2 | 1.12 | 157.3 | 80.45735 | 1    | 3.2 | 3.34   | 130 | 11 |
| <b>Cu</b> | 1.9  | 0.0355 | 0.073  | 2 | 1.12 | 157.3 | 80.45735 | 1    | 3.2 | 8.35   | 98  | 11 |
| <b>Cu</b> | 1.9  | 0.0355 | 0.073  | 2 | 1.12 | 157.3 | 80.45735 | 1    | 3.2 | 0.67   | 170 | 11 |
| <b>Cu</b> | 1.9  | 0.0355 | 0.073  | 2 | 1.12 | 157.3 | 80.45735 | 1    | 3.2 | 6.7    | 125 | 11 |
| <b>Cu</b> | 1.9  | 0.067  | 0.073  | 2 | 1.12 | 157.3 | 80.9519  | 1    | 3.2 | 0.335  | 175 | 11 |
| <b>Cu</b> | 1.9  | 0.067  | 0.073  | 2 | 1.12 | 157.3 | 80.9519  | 1    | 3.2 | 3.34   | 160 | 11 |
| <b>Cu</b> | 1.9  | 0.067  | 0.073  | 2 | 1.12 | 157.3 | 80.9519  | 1    | 3.2 | 8.35   | 130 | 11 |
| <b>Cu</b> | 1.9  | 0.067  | 0.073  | 2 | 1.12 | 157.3 | 80.9519  | 1    | 3.2 | 0.67   | 175 | 11 |
| <b>Cu</b> | 1.9  | 0.067  | 0.073  | 2 | 1.12 | 157.3 | 80.9519  | 1    | 3.2 | 6.7    | 152 | 11 |
| <b>Cu</b> | 1.9  | 0.095  | 0.073  | 2 | 1.12 | 157.3 | 81.3915  | 1    | 3.2 | 0.335  | 165 | 11 |
| <b>Cu</b> | 1.9  | 0.095  | 0.073  | 2 | 1.12 | 157.3 | 81.3915  | 1    | 3.2 | 3.34   | 117 | 11 |
| <b>Cu</b> | 1.9  | 0.095  | 0.073  | 2 | 1.12 | 157.3 | 81.3915  | 1    | 3.2 | 8.35   | 80  | 11 |
| <b>Cu</b> | 1.9  | 0.095  | 0.073  | 2 | 1.12 | 157.3 | 81.3915  | 1    | 3.2 | 0.67   | 169 | 11 |
| <b>Cu</b> | 1.9  | 0.095  | 0.073  | 2 | 1.12 | 157.3 | 81.3915  | 1    | 3.2 | 6.7    | 119 | 11 |
| <b>Mn</b> | 1.55 | 0.04   | 0.067  | 2 | 1.19 | 519.7 | 80.18    | 1    | 2.5 | 0.03   | 90  | 12 |
| <b>Mn</b> | 1.55 | 0.04   | 0.067  | 2 | 1.19 | 519.7 | 80.18    | 1    | 2.5 | 0.5    | 26  | 12 |
| <b>Mn</b> | 1.55 | 0.04   | 0.067  | 2 | 1.19 | 519.7 | 80.18    | 1    | 2.5 | 0.15   | 50  | 12 |
| <b>Ni</b> | 1.91 | 0.07   | 0.069  | 2 | 1.1  | 239.7 | 80.656   | 1    | 2.5 | 0.03   | 223 | 12 |
| <b>Ni</b> | 1.91 | 0.07   | 0.069  | 2 | 1.1  | 239.7 | 80.656   | 1    | 2.5 | 0.5    | 156 | 12 |
| <b>Ni</b> | 1.91 | 0.07   | 0.069  | 2 | 1.1  | 239.7 | 80.656   | 1    | 2.5 | 0.15   | 200 | 12 |
| <b>Cu</b> | 1.9  | 0.0255 | 0.073  | 2 | 1.12 | 157.3 | 80.30035 | 1    | 3   | 0.167  | 216 | 13 |
| <b>Cu</b> | 1.9  | 0.0255 | 0.073  | 2 | 1.12 | 157.3 | 80.30035 | 1    | 3   | 1.67   | 170 | 13 |
| <b>Cu</b> | 1.9  | 0.0255 | 0.073  | 2 | 1.12 | 157.3 | 80.30035 | 1    | 3   | 5      | 127 | 13 |
| <b>Cu</b> | 1.9  | 0.0255 | 0.073  | 2 | 1.12 | 157.3 | 80.30035 | 1    | 3   | 10     | 103 | 13 |
| <b>Cu</b> | 1.9  | 0.0255 | 0.073  | 2 | 1.12 | 157.3 | 80.30035 | 1    | 3   | 0.084  | 250 | 13 |
| <b>Cu</b> | 1.9  | 0.0255 | 0.073  | 2 | 1.12 | 157.3 | 80.30035 | 1    | 3   | 2.5    | 170 | 13 |
| <b>Cu</b> | 1.9  | 0.0255 | 0.073  | 2 | 1.12 | 157.3 | 80.30035 | 1    | 3   | 3.35   | 150 | 13 |
| <b>Cr</b> | 1.66 | 0.05   | 0.0615 | 3 | 1.22 | 756.5 | 80.105   | 1    | 3   | 0.167  | 145 | 14 |
| <b>Cr</b> | 1.66 | 0.05   | 0.0615 | 3 | 1.22 | 756.5 | 80.105   | 1    | 3   | 0.084  | 190 | 14 |
| <b>Cr</b> | 1.66 | 0.05   | 0.0615 | 3 | 1.22 | 756.5 | 80.105   | 1    | 3   | 0.835  | 100 | 14 |
| <b>Cr</b> | 1.66 | 0.05   | 0.0615 | 3 | 1.22 | 756.5 | 80.105   | 1    | 3   | 0.335  | 125 | 14 |
| <b>Co</b> | 1.88 | 0.025  | 0.065  | 2 | 1.11 | 606.6 | 80.175   | 0.01 | 3   | 0.0335 | 175 | 15 |
| <b>Co</b> | 1.88 | 0.025  | 0.065  | 2 | 1.11 | 606.6 | 80.175   | 0.01 | 3   | 0.067  | 146 | 15 |
| <b>Co</b> | 1.88 | 0.025  | 0.065  | 2 | 1.11 | 606.6 | 80.175   | 0.01 | 3   | 0.167  | 98  | 15 |
| <b>Co</b> | 1.88 | 0.025  | 0.065  | 2 | 1.11 | 606.6 | 80.175   | 0.01 | 3   | 0.335  | 90  | 15 |

|           |      |        |       |   |      |       |         |      |   |        |     |    |
|-----------|------|--------|-------|---|------|-------|---------|------|---|--------|-----|----|
| <b>Co</b> | 1.88 | 0.025  | 0.065 | 2 | 1.11 | 606.6 | 80.175  | 0.01 | 3 | 0.67   | 70  | 15 |
| <b>Co</b> | 1.88 | 0.042  | 0.065 | 2 | 1.11 | 606.6 | 80.362  | 0.01 | 3 | 0.0335 | 180 | 15 |
| <b>Co</b> | 1.88 | 0.042  | 0.065 | 2 | 1.11 | 606.6 | 80.362  | 0.01 | 3 | 0.067  | 150 | 15 |
| <b>Co</b> | 1.88 | 0.042  | 0.065 | 2 | 1.11 | 606.6 | 80.362  | 0.01 | 3 | 0.167  | 95  | 15 |
| <b>Co</b> | 1.88 | 0.042  | 0.065 | 2 | 1.11 | 606.6 | 80.362  | 0.01 | 3 | 0.335  | 80  | 15 |
| <b>Co</b> | 1.88 | 0.042  | 0.065 | 2 | 1.11 | 606.6 | 80.362  | 0.01 | 3 | 0.67   | 50  | 15 |
| <b>Co</b> | 1.88 | 0.058  | 0.065 | 2 | 1.11 | 606.6 | 80.538  | 0.01 | 3 | 0.0335 | 200 | 15 |
| <b>Co</b> | 1.88 | 0.058  | 0.065 | 2 | 1.11 | 606.6 | 80.538  | 0.01 | 3 | 0.067  | 176 | 15 |
| <b>Co</b> | 1.88 | 0.058  | 0.065 | 2 | 1.11 | 606.6 | 80.538  | 0.01 | 3 | 0.167  | 150 | 15 |
| <b>Co</b> | 1.88 | 0.058  | 0.065 | 2 | 1.11 | 606.6 | 80.538  | 0.01 | 3 | 0.335  | 116 | 15 |
| <b>Co</b> | 1.88 | 0.058  | 0.065 | 2 | 1.11 | 606.6 | 80.538  | 0.01 | 3 | 0.67   | 96  | 15 |
| <b>Sn</b> | 1.96 | 0.017  | 0.069 | 4 | 1.4  | 290.4 | 81.1036 | 0    | 3 | 0.05   | 245 | 16 |
| <b>Sn</b> | 1.96 | 0.017  | 0.069 | 4 | 1.4  | 290.4 | 81.1036 | 0    | 3 | 0.25   | 150 | 16 |
| <b>Sn</b> | 1.96 | 0.017  | 0.069 | 4 | 1.4  | 290.4 | 81.1036 | 0    | 3 | 1.25   | 105 | 16 |
| <b>Sn</b> | 1.96 | 0.017  | 0.069 | 4 | 1.4  | 290.4 | 81.1036 | 0    | 3 | 5      | 220 | 16 |
| <b>Nb</b> | 1.6  | 0.0237 | 0.069 | 5 | 1.47 | 379.9 | 80.9665 | 1    | 3 | 0.167  | 175 | 17 |
| <b>Nb</b> | 1.6  | 0.0237 | 0.069 | 5 | 1.47 | 379.9 | 80.9665 | 1    | 3 | 0.335  | 160 | 17 |
| <b>Nb</b> | 1.6  | 0.0237 | 0.069 | 5 | 1.47 | 379.9 | 80.9665 | 1    | 3 | 0.668  | 148 | 17 |
| <b>Nb</b> | 1.6  | 0.0237 | 0.069 | 5 | 1.47 | 379.9 | 80.9665 | 1    | 3 | 1.67   | 125 | 17 |
| <b>Nb</b> | 1.6  | 0.0237 | 0.069 | 5 | 1.47 | 379.9 | 80.9665 | 1    | 3 | 3.35   | 112 | 17 |
| <b>Nb</b> | 1.6  | 0.0237 | 0.069 | 5 | 1.47 | 379.9 | 80.9665 | 1    | 3 | 5      | 109 | 17 |
| <b>Nb</b> | 1.6  | 0.0644 | 0.069 | 5 | 1.47 | 379.9 | 82.798  | 1    | 3 | 0.167  | 190 | 17 |
| <b>Nb</b> | 1.6  | 0.0644 | 0.069 | 5 | 1.47 | 379.9 | 82.798  | 1    | 3 | 0.335  | 174 | 17 |
| <b>Nb</b> | 1.6  | 0.0644 | 0.069 | 5 | 1.47 | 379.9 | 82.798  | 1    | 3 | 0.668  | 160 | 17 |
| <b>Nb</b> | 1.6  | 0.0644 | 0.069 | 5 | 1.47 | 379.9 | 82.798  | 1    | 3 | 1.67   | 135 | 17 |
| <b>Nb</b> | 1.6  | 0.0644 | 0.069 | 5 | 1.47 | 379.9 | 82.798  | 1    | 3 | 3.35   | 126 | 17 |
| <b>Nb</b> | 1.6  | 0.0644 | 0.069 | 5 | 1.47 | 379.9 | 82.798  | 1    | 3 | 5      | 120 | 17 |
| <b>Nb</b> | 1.6  | 0.0976 | 0.069 | 5 | 1.47 | 379.9 | 84.292  | 1    | 3 | 0.167  | 210 | 17 |
| <b>Nb</b> | 1.6  | 0.0976 | 0.069 | 5 | 1.47 | 379.9 | 84.292  | 1    | 3 | 0.335  | 198 | 17 |
| <b>Nb</b> | 1.6  | 0.0976 | 0.069 | 5 | 1.47 | 379.9 | 84.292  | 1    | 3 | 0.668  | 180 | 17 |
| <b>Nb</b> | 1.6  | 0.0976 | 0.069 | 5 | 1.47 | 379.9 | 84.292  | 1    | 3 | 1.67   | 168 | 17 |
| <b>Nb</b> | 1.6  | 0.0976 | 0.069 | 5 | 1.47 | 379.9 | 84.292  | 1    | 3 | 3.35   | 147 | 17 |
| <b>Nb</b> | 1.6  | 0.0976 | 0.069 | 5 | 1.47 | 379.9 | 84.292  | 1    | 3 | 5      | 139 | 17 |
| <b>Nb</b> | 1.6  | 0.04   | 0.069 | 5 | 1.47 | 379.9 | 81.7    | 1    | 3 | 0.335  | 175 | 18 |
| <b>Nb</b> | 1.6  | 0.04   | 0.069 | 5 | 1.47 | 379.9 | 81.7    | 1    | 3 | 1.67   | 125 | 18 |
| <b>Nb</b> | 1.6  | 0.04   | 0.069 | 5 | 1.47 | 379.9 | 81.7    | 1    | 3 | 6.7    | 80  | 18 |
| <b>Nb</b> | 1.6  | 0.04   | 0.069 | 5 | 1.47 | 379.9 | 81.7    | 1    | 3 | 0.167  | 180 | 18 |
| <b>Nb</b> | 1.6  | 0.04   | 0.069 | 5 | 1.47 | 379.9 | 81.7    | 1    | 3 | 0.067  | 205 | 18 |
| <b>Nb</b> | 1.6  | 0.04   | 0.069 | 5 | 1.47 | 379.9 | 81.7    | 1    | 3 | 0.67   | 149 | 18 |

|           |      |        |       |   |      |       |          |      |     |       |     |    |
|-----------|------|--------|-------|---|------|-------|----------|------|-----|-------|-----|----|
| <b>Nb</b> | 1.6  | 0.04   | 0.069 | 5 | 1.47 | 379.9 | 81.7     | 1    | 3   | 3.35  | 110 | 18 |
| <b>Nb</b> | 1.6  | 0.07   | 0.069 | 5 | 1.47 | 379.9 | 83.05    | 1    | 3   | 0.335 | 168 | 18 |
| <b>Nb</b> | 1.6  | 0.07   | 0.069 | 5 | 1.47 | 379.9 | 83.05    | 1    | 3   | 1.67  | 120 | 18 |
| <b>Nb</b> | 1.6  | 0.07   | 0.069 | 5 | 1.47 | 379.9 | 83.05    | 1    | 3   | 6.7   | 72  | 18 |
| <b>Nb</b> | 1.6  | 0.07   | 0.069 | 5 | 1.47 | 379.9 | 83.05    | 1    | 3   | 0.167 | 175 | 18 |
| <b>Nb</b> | 1.6  | 0.07   | 0.069 | 5 | 1.47 | 379.9 | 83.05    | 1    | 3   | 0.067 | 195 | 18 |
| <b>Nb</b> | 1.6  | 0.07   | 0.069 | 5 | 1.47 | 379.9 | 83.05    | 1    | 3   | 0.67  | 143 | 18 |
| <b>Nb</b> | 1.6  | 0.07   | 0.069 | 5 | 1.47 | 379.9 | 83.05    | 1    | 3   | 3.35  | 106 | 18 |
| <b>Nb</b> | 1.6  | 0.001  | 0.069 | 5 | 1.47 | 379.9 | 79.945   | 1    | 2.9 | 0.335 | 190 | 19 |
| <b>Nb</b> | 1.6  | 0.001  | 0.069 | 5 | 1.47 | 379.9 | 79.945   | 1    | 2.9 | 1.67  | 140 | 19 |
| <b>Nb</b> | 1.6  | 0.001  | 0.069 | 5 | 1.47 | 379.9 | 79.945   | 1    | 2.9 | 5     | 105 | 19 |
| <b>Nb</b> | 1.6  | 0.001  | 0.069 | 5 | 1.47 | 379.9 | 79.945   | 1    | 2.9 | 0.167 | 215 | 19 |
| <b>Nb</b> | 1.6  | 0.001  | 0.069 | 5 | 1.47 | 379.9 | 79.945   | 1    | 2.9 | 10    | 79  | 19 |
| <b>Nb</b> | 1.6  | 0.01   | 0.069 | 5 | 1.47 | 379.9 | 80.35    | 1    | 2.9 | 0.335 | 145 | 19 |
| <b>Nb</b> | 1.6  | 0.01   | 0.069 | 5 | 1.47 | 379.9 | 80.35    | 1    | 2.9 | 1.67  | 96  | 19 |
| <b>Nb</b> | 1.6  | 0.01   | 0.069 | 5 | 1.47 | 379.9 | 80.35    | 1    | 2.9 | 5     | 63  | 19 |
| <b>Nb</b> | 1.6  | 0.01   | 0.069 | 5 | 1.47 | 379.9 | 80.35    | 1    | 2.9 | 0.167 | 160 | 19 |
| <b>Nb</b> | 1.6  | 0.01   | 0.069 | 5 | 1.47 | 379.9 | 80.35    | 1    | 2.9 | 10    | 62  | 19 |
| <b>Nb</b> | 1.6  | 0.1    | 0.069 | 5 | 1.47 | 379.9 | 84.4     | 1    | 2.9 | 0.335 | 105 | 19 |
| <b>Nb</b> | 1.6  | 0.1    | 0.069 | 5 | 1.47 | 379.9 | 84.4     | 1    | 2.9 | 1.67  | 65  | 19 |
| <b>Nb</b> | 1.6  | 0.1    | 0.069 | 5 | 1.47 | 379.9 | 84.4     | 1    | 2.9 | 5     | 47  | 19 |
| <b>Nb</b> | 1.6  | 0.1    | 0.069 | 5 | 1.47 | 379.9 | 84.4     | 1    | 2.9 | 0.167 | 120 | 19 |
| <b>Nb</b> | 1.6  | 0.1    | 0.069 | 5 | 1.47 | 379.9 | 84.4     | 1    | 2.9 | 10    | 32  | 19 |
| <b>Cu</b> | 1.9  | 0.0233 | 0.073 | 2 | 1.12 | 157.3 | 80.26581 | 1    | 3   | 3.35  | 120 | 20 |
| <b>Cu</b> | 1.9  | 0.0233 | 0.073 | 2 | 1.12 | 157.3 | 80.26581 | 1    | 3   | 1.67  | 130 | 20 |
| <b>Cu</b> | 1.9  | 0.0233 | 0.073 | 2 | 1.12 | 157.3 | 80.26581 | 1    | 3   | 0.084 | 195 | 20 |
| <b>Cu</b> | 1.9  | 0.0233 | 0.073 | 2 | 1.12 | 157.3 | 80.26581 | 1    | 3   | 0.167 | 177 | 20 |
| <b>Cu</b> | 1.9  | 0.0233 | 0.073 | 2 | 1.12 | 157.3 | 80.26581 | 1    | 3   | 0.335 | 170 | 20 |
| <b>Sn</b> | 1.96 | 0.06   | 0.069 | 4 | 1.4  | 290.4 | 84.148   | 0.05 | 3   | 0.1   | 260 | 21 |
| <b>Sn</b> | 1.96 | 0.06   | 0.069 | 4 | 1.4  | 290.4 | 84.148   | 0.05 | 3   | 0.2   | 223 | 21 |
| <b>Sn</b> | 1.96 | 0.06   | 0.069 | 4 | 1.4  | 290.4 | 84.148   | 0.05 | 3   | 0.3   | 200 | 21 |
| <b>Sn</b> | 1.96 | 0.06   | 0.069 | 4 | 1.4  | 290.4 | 84.148   | 0.05 | 3   | 0.5   | 172 | 21 |
| <b>Sn</b> | 1.96 | 0.06   | 0.069 | 4 | 1.4  | 290.4 | 84.148   | 0.05 | 3   | 1     | 135 | 21 |
| <b>Sn</b> | 1.96 | 0.06   | 0.069 | 4 | 1.4  | 290.4 | 84.148   | 0.05 | 3   | 1.5   | 110 | 21 |
| <b>Sn</b> | 1.96 | 0.11   | 0.069 | 4 | 1.4  | 290.4 | 87.688   | 0.05 | 3   | 0.1   | 320 | 21 |
| <b>Sn</b> | 1.96 | 0.11   | 0.069 | 4 | 1.4  | 290.4 | 87.688   | 0.05 | 3   | 0.2   | 267 | 21 |
| <b>Sn</b> | 1.96 | 0.11   | 0.069 | 4 | 1.4  | 290.4 | 87.688   | 0.05 | 3   | 0.3   | 248 | 21 |
| <b>Sn</b> | 1.96 | 0.11   | 0.069 | 4 | 1.4  | 290.4 | 87.688   | 0.05 | 3   | 0.5   | 213 | 21 |
| <b>Sn</b> | 1.96 | 0.11   | 0.069 | 4 | 1.4  | 290.4 | 87.688   | 0.05 | 3   | 1     | 170 | 21 |

|           |      |        |        |   |      |       |          |      |     |        |     |    |
|-----------|------|--------|--------|---|------|-------|----------|------|-----|--------|-----|----|
| <b>Sn</b> | 1.96 | 0.11   | 0.069  | 4 | 1.4  | 290.4 | 87.688   | 0.05 | 3   | 1.5    | 148 | 21 |
| <b>Sn</b> | 1.96 | 0.15   | 0.069  | 4 | 1.4  | 290.4 | 90.52    | 0.05 | 3   | 0.1    | 332 | 21 |
| <b>Sn</b> | 1.96 | 0.15   | 0.069  | 4 | 1.4  | 290.4 | 90.52    | 0.05 | 3   | 0.2    | 280 | 21 |
| <b>Sn</b> | 1.96 | 0.15   | 0.069  | 4 | 1.4  | 290.4 | 90.52    | 0.05 | 3   | 0.3    | 252 | 21 |
| <b>Sn</b> | 1.96 | 0.15   | 0.069  | 4 | 1.4  | 290.4 | 90.52    | 0.05 | 3   | 0.5    | 226 | 21 |
| <b>Sn</b> | 1.96 | 0.15   | 0.069  | 4 | 1.4  | 290.4 | 90.52    | 0.05 | 3   | 1      | 175 | 21 |
| <b>Sn</b> | 1.96 | 0.15   | 0.069  | 4 | 1.4  | 290.4 | 90.52    | 0.05 | 3   | 1.5    | 146 | 21 |
| <b>Cu</b> | 1.9  | 0.0544 | 0.077  | 1 | 1.12 | 157.3 | 80.74864 | 0.01 | 3   | 0.5    | 246 | 22 |
| <b>Cu</b> | 1.9  | 0.0544 | 0.077  | 1 | 1.12 | 157.3 | 80.74864 | 0.01 | 3   | 2      | 150 | 22 |
| <b>Cu</b> | 1.9  | 0.0544 | 0.077  | 1 | 1.12 | 157.3 | 80.74864 | 0.01 | 3   | 0.05   | 340 | 22 |
| <b>Cu</b> | 1.9  | 0.0544 | 0.077  | 1 | 1.12 | 157.3 | 80.74864 | 0.01 | 3   | 0.1    | 205 | 22 |
| <b>Cu</b> | 1.9  | 0.0544 | 0.077  | 1 | 1.12 | 157.3 | 80.74864 | 0.01 | 3   | 0.25   | 278 | 22 |
| <b>Cu</b> | 1.9  | 0.0544 | 0.077  | 1 | 1.12 | 157.3 | 80.74864 | 0.01 | 3   | 0.5    | 220 | 22 |
| <b>Cu</b> | 1.9  | 0.0544 | 0.077  | 1 | 1.12 | 157.3 | 80.74864 | 0.01 | 3   | 1      | 185 | 22 |
| <b>Cu</b> | 1.9  | 0.0233 | 0.077  | 1 | 1.12 | 157.3 | 80.26348 | 0.01 | 3   | 0.05   | 255 | 22 |
| <b>Cu</b> | 1.9  | 0.0233 | 0.077  | 1 | 1.12 | 157.3 | 80.26348 | 0.01 | 3   | 0.1    | 247 | 22 |
| <b>Cu</b> | 1.9  | 0.0233 | 0.077  | 1 | 1.12 | 157.3 | 80.26348 | 0.01 | 3   | 0.25   | 206 | 22 |
| <b>Cu</b> | 1.9  | 0.0233 | 0.077  | 1 | 1.12 | 157.3 | 80.26348 | 0.01 | 3   | 0.5    | 180 | 22 |
| <b>Cu</b> | 1.9  | 0.0233 | 0.077  | 1 | 1.12 | 157.3 | 80.26348 | 0.01 | 3   | 1      | 158 | 22 |
| <b>Cu</b> | 1.9  | 0.0233 | 0.077s | 1 | 1.12 | 157.3 | 80.26348 | 0.01 | 3   | 2      | 143 | 22 |
| <b>Mn</b> | 1.55 | 0.031  | 0.067  | 2 | 1.19 | 519.7 | 80.117   | 1    | 2.5 | 0.03   | 185 | 23 |
| <b>Mn</b> | 1.55 | 0.031  | 0.067  | 2 | 1.19 | 519.7 | 80.117   | 1    | 2.5 | 0.15   | 160 | 23 |
| <b>Mn</b> | 1.55 | 0.031  | 0.067  | 2 | 1.19 | 519.7 | 80.117   | 1    | 2.5 | 0.5    | 145 | 23 |
| <b>Ni</b> | 1.91 | 0.05   | 0.069  | 2 | 1.1  | 239.7 | 80.44    | 1    | 3   | 0.335  | 138 | 24 |
| <b>Ni</b> | 1.91 | 0.05   | 0.069  | 2 | 1.1  | 239.7 | 80.44    | 1    | 3   | 6.7    | 72  | 24 |
| <b>Ni</b> | 1.91 | 0.05   | 0.069  | 2 | 1.1  | 239.7 | 80.44    | 1    | 3   | 0.0335 | 314 | 24 |
| <b>Ni</b> | 1.91 | 0.05   | 0.069  | 2 | 1.1  | 239.7 | 80.44    | 1    | 3   | 0.167  | 153 | 24 |
| <b>Ni</b> | 1.91 | 0.05   | 0.069  | 2 | 1.1  | 239.7 | 80.44    | 1    | 3   | 0.67   | 120 | 24 |
| <b>Ni</b> | 1.91 | 0.05   | 0.069  | 2 | 1.1  | 239.7 | 80.44    | 1    | 3   | 1.67   | 105 | 24 |
| <b>Zn</b> | 1.65 | 0.05   | 0.074  | 2 | 1.18 | 348.3 | 80.775   | 1    | 3.5 | 0.0335 | 190 | 25 |
| <b>Zn</b> | 1.65 | 0.05   | 0.074  | 2 | 1.18 | 348.3 | 80.775   | 1    | 3.5 | 0.167  | 168 | 25 |
| <b>Zn</b> | 1.65 | 0.05   | 0.074  | 2 | 1.18 | 348.3 | 80.775   | 1    | 3.5 | 0.835  | 110 | 25 |
| <b>Zn</b> | 1.65 | 0.05   | 0.074  | 2 | 1.18 | 348.3 | 80.775   | 1    | 3.5 | 1.67   | 75  | 25 |
| <b>Zn</b> | 1.65 | 0.05   | 0.074  | 2 | 1.18 | 348.3 | 80.775   | 1    | 3.5 | 3.35   | 45  | 25 |
| <b>Al</b> | 1.61 | 0.064  | 0.0535 | 3 | 1.26 | 1054  | 78.5624  | 1    | 3   | 0.335  | 175 | 26 |
| <b>Al</b> | 1.61 | 0.064  | 0.0535 | 3 | 1.26 | 1054  | 78.5624  | 1    | 3   | 1.67   | 118 | 26 |
| <b>Cr</b> | 1.66 | 0.05   | 0.0615 | 3 | 1.22 | 756.5 | 80.105   | 1.01 | 2.5 | 0.0335 | 218 | 27 |
| <b>Cr</b> | 1.66 | 0.05   | 0.0615 | 3 | 1.22 | 756.5 | 80.105   | 1.01 | 2.5 | 0.067  | 180 | 27 |
| <b>Cr</b> | 1.66 | 0.05   | 0.0615 | 3 | 1.22 | 756.5 | 80.105   | 1.01 | 2.5 | 0.167  | 175 | 27 |

|           |      |        |        |   |      |       |         |      |     |        |     |    |
|-----------|------|--------|--------|---|------|-------|---------|------|-----|--------|-----|----|
| <b>Cr</b> | 1.66 | 0.05   | 0.0615 | 3 | 1.22 | 756.5 | 80.105  | 1.01 | 2.5 | 0.335  | 150 | 27 |
| <b>Cr</b> | 1.66 | 0.05   | 0.0615 | 3 | 1.22 | 756.5 | 80.105  | 1.01 | 2.5 | 1.67   | 110 | 27 |
| <b>Nb</b> | 1.6  | 0.065  | 0.069  | 5 | 1.47 | 379.9 | 82.825  | 1    | 3   | 0.042  | 168 | 28 |
| <b>Nb</b> | 1.6  | 0.065  | 0.069  | 5 | 1.47 | 379.9 | 82.825  | 1    | 3   | 0.056  | 160 | 28 |
| <b>Nb</b> | 1.6  | 0.065  | 0.069  | 5 | 1.47 | 379.9 | 82.825  | 1    | 3   | 0.084  | 140 | 28 |
| <b>Nb</b> | 1.6  | 0.065  | 0.069  | 5 | 1.47 | 379.9 | 82.825  | 1    | 3   | 1.67   | 125 | 28 |
| <b>Nb</b> | 1.6  | 0.065  | 0.069  | 5 | 1.47 | 379.9 | 82.825  | 1    | 3   | 0.335  | 110 | 28 |
| <b>Nb</b> | 1.6  | 0.065  | 0.069  | 5 | 1.47 | 379.9 | 82.825  | 1    | 3   | 0.67   | 88  | 28 |
| <b>Co</b> | 1.88 | 0.0121 | 0.061  | 3 | 1.11 | 606.6 | 80.0331 | 0.5  | 3   | 0.067  | 216 | 29 |
| <b>Co</b> | 1.88 | 0.0121 | 0.061  | 3 | 1.11 | 606.6 | 80.0331 | 0.5  | 3   | 0.335  | 185 | 29 |
| <b>Co</b> | 1.88 | 0.0121 | 0.061  | 3 | 1.11 | 606.6 | 80.0331 | 0.5  | 3   | 0.67   | 172 | 29 |
| <b>Co</b> | 1.88 | 0.0121 | 0.061  | 3 | 1.11 | 606.6 | 80.0331 | 0.5  | 3   | 1.67   | 149 | 29 |
| <b>Co</b> | 1.88 | 0.0121 | 0.061  | 3 | 1.11 | 606.6 | 80.0331 | 0.5  | 3   | 3.35   | 105 | 29 |
| <b>W</b>  | 2.36 | NAN    | 0.06   | 6 | 1.37 | 281   | 81.259  | 1    | 3   | 1      | 173 | 30 |
| <b>W</b>  | 2.36 | NAN    | 0.06   | 6 | 1.37 | 281   | 81.259  | 1    | 3   | 0.1    | 189 | 30 |
| <b>W</b>  | 2.36 | NAN    | 0.06   | 6 | 1.37 | 281   | 81.259  | 1    | 3   | 0.2    | 182 | 30 |
| <b>W</b>  | 2.36 | NAN    | 0.06   | 6 | 1.37 | 281   | 81.259  | 1    | 3   | 0.5    | 178 | 30 |
| <b>W</b>  | 2.36 | NAN    | 0.06   | 6 | 1.37 | 281   | 81.259  | 1    | 3   | 1      | 173 | 30 |
| <b>W</b>  | 2.36 | NAN    | 0.06   | 6 | 1.37 | 281   | 81.259  | 1    | 3   | 2      | 169 | 30 |
| <b>Sn</b> | 1.96 | 0.1    | 0.069  | 4 | 1.4  | 580.7 | 86.98   | 0.1  | 3   | 0.335  | 370 | 31 |
| <b>Sn</b> | 1.96 | 0.1    | 0.069  | 4 | 1.4  | 580.7 | 86.98   | 0.1  | 3   | 0.0335 | 440 | 31 |
| <b>Sn</b> | 1.96 | 0.1    | 0.069  | 4 | 1.4  | 580.7 | 86.98   | 0.1  | 3   | 1      | 340 | 31 |
| <b>Sn</b> | 1.96 | 0.1    | 0.069  | 4 | 1.4  | 580.7 | 86.98   | 0.1  | 3   | 1.67   | 325 | 31 |
| <b>Sn</b> | 1.96 | 0.1    | 0.069  | 4 | 1.4  | 580.7 | 86.98   | 0.1  | 3   | 3.35   | 290 | 31 |
| <b>Mn</b> | 1.55 | 0.279  | 0.067  | 2 | 1.19 | 519.7 | 81.853  | 0.01 | 3   | 0.4    | 275 | 32 |
| <b>Mn</b> | 1.55 | 0.279  | 0.067  | 2 | 1.19 | 519.7 | 81.853  | 0.01 | 3   | 0.8    | 205 | 32 |
| <b>Mn</b> | 1.55 | 0.279  | 0.067  | 2 | 1.19 | 519.7 | 81.853  | 0.01 | 3   | 1.6    | 165 | 32 |
| <b>Mn</b> | 1.55 | 0.279  | 0.067  | 2 | 1.19 | 519.7 | 81.853  | 0.01 | 3   | 3.2    | 147 | 32 |
| <b>Cu</b> | 1.9  | 0.15   | 0.073  | 2 | 1.12 | 157.9 | 82.255  | 1    | 3   | 0.167  | 243 | 33 |
| <b>Cu</b> | 1.9  | 0.15   | 0.073  | 2 | 1.12 | 157.9 | 82.255  | 1    | 3   | 0.335  | 235 | 33 |
| <b>Cu</b> | 1.9  | 0.15   | 0.073  | 2 | 1.12 | 157.9 | 82.255  | 1    | 3   | 0.67   | 223 | 33 |
| <b>Cu</b> | 1.9  | 0.15   | 0.073  | 2 | 1.12 | 157.9 | 82.255  | 1    | 3   | 1.67   | 190 | 33 |
| <b>Cu</b> | 1.9  | 0.15   | 0.073  | 2 | 1.12 | 157.9 | 82.255  | 1    | 3   | 3.35   | 175 | 33 |
| <b>Cu</b> | 1.9  | 0.15   | 0.073  | 2 | 1.12 | 157.9 | 82.255  | 1    | 3   | 5      | 160 | 33 |
| <b>Cu</b> | 1.9  | 0.15   | 0.073  | 2 | 1.12 | 157.9 | 82.255  | 1    | 3   | 6.7    | 152 | 33 |
| <b>Zr</b> | 1.33 | 0.01   | 0.072  | 4 | 1.54 | 547   | 80.333  | 1    | 3   | 0.0167 | 135 | 34 |
| <b>Zr</b> | 1.33 | 0.003  | 0.072  | 4 | 1.54 | 547   | 80.0299 | 1    | 3   | 0.0167 | 63  | 34 |
| <b>Zr</b> | 1.33 | 0.006  | 0.072  | 4 | 1.54 | 547   | 80.1598 | 1    | 3   | 0.0167 | 78  | 34 |
| <b>Zr</b> | 1.33 | 0.026  | 0.072  | 4 | 1.54 | 547   | 81.0258 | 1    | 3   | 0.0167 | 87  | 34 |



|           |      |       |        |   |      |       |         |      |   |        |     |    |
|-----------|------|-------|--------|---|------|-------|---------|------|---|--------|-----|----|
| <b>Sn</b> | 1.96 | 0.11  | 0.069  | 4 | 1.4  | 290.4 | 87.688  | 0.05 | 3 | 0.1    | 319 | 35 |
| <b>Sn</b> | 1.96 | 0.11  | 0.069  | 4 | 1.4  | 290.4 | 87.688  | 0.05 | 3 | 0.2    | 270 | 35 |
| <b>Sn</b> | 1.96 | 0.11  | 0.069  | 4 | 1.4  | 290.4 | 87.688  | 0.05 | 3 | 0.3    | 246 | 35 |
| <b>Sn</b> | 1.96 | 0.11  | 0.069  | 4 | 1.4  | 290.4 | 87.688  | 0.05 | 3 | 0.5    | 207 | 35 |
| <b>Sn</b> | 1.96 | 0.11  | 0.069  | 4 | 1.4  | 290.4 | 87.688  | 0.05 | 3 | 1      | 158 | 35 |
| <b>Sn</b> | 1.96 | 0.11  | 0.069  | 4 | 1.4  | 290.4 | 87.688  | 0.05 | 3 | 1.5    | 130 | 35 |
| <b>Cr</b> | 1.66 | NAN   | 0.0615 | 3 | 1.22 | 756.5 | 80.105  | 1    | 3 | 0.084  | 110 | 14 |
| <b>Cr</b> | 1.66 | NAN   | 0.0615 | 3 | 1.22 | 756.5 | 80.105  | 1    | 3 | 0.835  | 100 | 14 |
| <b>Cr</b> | 1.66 | NAN   | 0.0615 | 3 | 1.22 | 756.5 | 80.105  | 1    | 3 | 0.167  | 140 | 14 |
| <b>Cr</b> | 1.66 | NAN   | 0.0615 | 3 | 1.22 | 756.5 | 80.105  | 1    | 3 | 0.335  | 125 | 14 |
| <b>Mg</b> | 1.31 | 0.038 | 0.072  | 2 | 1.39 | 601.6 | 79.0032 | 1    | 3 | 0.0335 | 156 | 36 |
| <b>Mg</b> | 1.31 | 0.038 | 0.072  | 2 | 1.39 | 601.6 | 79.0032 | 1    | 3 | 0.084  | 148 | 36 |
| <b>Mg</b> | 1.31 | 0.038 | 0.072  | 2 | 1.39 | 601.6 | 79.0032 | 1    | 3 | 0.167  | 137 | 36 |
| <b>Mg</b> | 1.31 | 0.038 | 0.072  | 2 | 1.39 | 601.6 | 79.0032 | 1    | 3 | 0.501  | 112 | 36 |
| <b>Mg</b> | 1.31 | 0.038 | 0.072  | 2 | 1.39 | 601.6 | 79.0032 | 1    | 3 | 0.835  | 90  | 36 |
| <b>Mg</b> | 1.31 | 0.038 | 0.072  | 2 | 1.39 | 601.6 | 79.0032 | 1    | 3 | 1.67   | 73  | 36 |
| <b>Ti</b> | 1.62 | 0.04  | 0.067  | 3 | 1.36 | 1012  | 79.9    | 1    | 3 | 0.05   | 250 | 37 |
| <b>Ti</b> | 1.62 | 0.04  | 0.067  | 3 | 1.36 | 1012  | 79.9    | 1    | 3 | 0.1    | 205 | 37 |
| <b>Ti</b> | 1.62 | 0.04  | 0.067  | 3 | 1.36 | 1012  | 79.9    | 1    | 3 | 0.2    | 176 | 37 |
| <b>Ti</b> | 1.62 | 0.04  | 0.067  | 3 | 1.36 | 1012  | 79.9    | 1    | 3 | 0.5    | 151 | 37 |
| <b>Ti</b> | 1.62 | 0.04  | 0.067  | 3 | 1.36 | 1012  | 79.9    | 1    | 3 | 1      | 130 | 37 |
| <b>Ti</b> | 1.62 | 0.04  | 0.067  | 3 | 1.36 | 1012  | 79.9    | 1    | 3 | 2      | 96  | 37 |
| <b>Ti</b> | 1.62 | 0.04  | 0.067  | 3 | 1.36 | 1012  | 79.9    | 1    | 3 | 3      | 75  | 37 |
| <b>Zn</b> | 1.65 | 0.2   | 0.074  | 2 | 1.18 | 348.3 | 83.4    | 0.01 | 3 | 0.1    | 220 | 38 |
| <b>Zn</b> | 1.65 | 0.2   | 0.074  | 2 | 1.18 | 348.3 | 83.4    | 0.01 | 3 | 0.3    | 205 | 38 |
| <b>Zn</b> | 1.65 | 0.2   | 0.074  | 2 | 1.18 | 348.3 | 83.4    | 0.01 | 3 | 0.5    | 190 | 38 |
| <b>Zn</b> | 1.65 | 0.2   | 0.074  | 2 | 1.18 | 348.3 | 83.4    | 0.01 | 3 | 1      | 182 | 38 |
| <b>Zn</b> | 1.65 | 0.2   | 0.074  | 2 | 1.18 | 348.3 | 83.4    | 0.01 | 3 | 2      | 170 | 38 |
| <b>Zn</b> | 1.65 | 0.2   | 0.074  | 2 | 1.18 | 348.3 | 83.4    | 0.01 | 3 | 3      | 153 | 38 |
| <b>Nb</b> | 1.6  | 0.03  | 0.069  | 5 | 1.47 | 379.9 | 81.25   | 1    | 3 | 0.084  | 180 | 39 |
| <b>Nb</b> | 1.6  | 0.03  | 0.069  | 5 | 1.47 | 379.9 | 81.25   | 1    | 3 | 0.167  | 171 | 39 |
| <b>Nb</b> | 1.6  | 0.03  | 0.069  | 5 | 1.47 | 379.9 | 81.25   | 1    | 3 | 0.335  | 162 | 39 |
| <b>Nb</b> | 1.6  | 0.03  | 0.069  | 5 | 1.47 | 379.9 | 81.25   | 1    | 3 | 0.835  | 150 | 39 |
| <b>Nb</b> | 1.6  | 0.03  | 0.069  | 5 | 1.47 | 379.9 | 81.25   | 1    | 3 | 1.67   | 125 | 39 |
| <b>Nb</b> | 1.6  | 0.03  | 0.069  | 5 | 1.47 | 379.9 | 81.25   | 1    | 3 | 3.35   | 100 | 39 |
| <b>Nb</b> | 1.6  | 0.03  | 0.069  | 5 | 1.47 | 379.9 | 81.25   | 1    | 3 | 6.68   | 76  | 39 |
| <b>Nb</b> | 1.6  | 0.05  | 0.069  | 5 | 1.47 | 379.9 | 82.15   | 1    | 3 | 0.084  | 193 | 39 |
| <b>Nb</b> | 1.6  | 0.05  | 0.069  | 5 | 1.47 | 379.9 | 82.15   | 1    | 3 | 0.167  | 185 | 39 |
| <b>Nb</b> | 1.6  | 0.05  | 0.069  | 5 | 1.47 | 379.9 | 82.15   | 1    | 3 | 0.335  | 175 | 39 |

|           |      |      |       |   |      |       |        |   |   |       |     |    |
|-----------|------|------|-------|---|------|-------|--------|---|---|-------|-----|----|
| <b>Nb</b> | 1.6  | 0.05 | 0.069 | 5 | 1.47 | 379.9 | 82.15  | 1 | 3 | 0.835 | 148 | 39 |
| <b>Nb</b> | 1.6  | 0.05 | 0.069 | 5 | 1.47 | 379.9 | 82.15  | 1 | 3 | 1.67  | 138 | 39 |
| <b>Nb</b> | 1.6  | 0.05 | 0.069 | 5 | 1.47 | 379.9 | 82.15  | 1 | 3 | 3.35  | 118 | 39 |
| <b>Nb</b> | 1.6  | 0.05 | 0.069 | 5 | 1.47 | 379.9 | 82.15  | 1 | 3 | 6.68  | 98  | 39 |
| <b>Nb</b> | 1.6  | 0.1  | 0.069 | 5 | 1.47 | 379.9 | 84.4   | 1 | 3 | 0.084 | 178 | 39 |
| <b>Nb</b> | 1.6  | 0.1  | 0.069 | 5 | 1.47 | 379.9 | 84.4   | 1 | 3 | 0.167 | 157 | 39 |
| <b>Nb</b> | 1.6  | 0.1  | 0.069 | 5 | 1.47 | 379.9 | 84.4   | 1 | 3 | 0.335 | 132 | 39 |
| <b>Nb</b> | 1.6  | 0.1  | 0.069 | 5 | 1.47 | 379.9 | 84.4   | 1 | 3 | 0.835 | 110 | 39 |
| <b>Nb</b> | 1.6  | 0.1  | 0.069 | 5 | 1.47 | 379.9 | 84.4   | 1 | 3 | 1.67  | 80  | 39 |
| <b>Nb</b> | 1.6  | 0.1  | 0.069 | 5 | 1.47 | 379.9 | 84.4   | 1 | 3 | 3.35  | 58  | 39 |
| <b>Nb</b> | 1.6  | 0.1  | 0.069 | 5 | 1.47 | 379.9 | 84.4   | 1 | 3 | 6.68  | 45  | 39 |
| <b>Ni</b> | 1.91 | 0.08 | 0.069 | 2 | 1.1  | 239.7 | 80.764 | 1 | 3 | 0.03  | 190 | 40 |
| <b>Ni</b> | 1.91 | 0.08 | 0.069 | 2 | 1.1  | 239.7 | 80.764 | 1 | 3 | 0.15  | 150 | 40 |
| <b>Ni</b> | 1.91 | 0.08 | 0.069 | 2 | 1.1  | 239.7 | 80.764 | 1 | 3 | 0.3   | 138 | 40 |
| <b>Ni</b> | 1.91 | 0.08 | 0.069 | 2 | 1.1  | 239.7 | 80.764 | 1 | 3 | 0.7   | 129 | 40 |
| <b>Ni</b> | 1.91 | 0.08 | 0.069 | 2 | 1.1  | 239.7 | 80.764 | 1 | 3 | 1.8   | 100 | 40 |

**Supplementary Table S2.** Names (units) and abbreviations of all the features.

| <b>Features</b>                                          |                      |                                                       |                      |
|----------------------------------------------------------|----------------------|-------------------------------------------------------|----------------------|
| <b>Dopant features</b>                                   |                      | <b>Experiment features</b>                            |                      |
| <b>Names (Units)</b>                                     | <b>Abbreviations</b> | <b>Names (Units)</b>                                  | <b>Abbreviations</b> |
| Electronegativity of the doped elements                  | en                   | Current density (A/ g)                                | current              |
| The atom ratio of dopant and Ti                          | ratio                | Lowest potential during charging and discharging (V)  | low                  |
| Dopant's ionic radius (nm)                               | radius               | Highest potential during charging and discharging (V) | high                 |
| State of the dopant                                      | state                |                                                       |                      |
| Material molecule mass                                   | Mweight              |                                                       |                      |
| Molecule single bond covalent radius (nm)                | rc                   |                                                       |                      |
| Bond formation enthalpy of doped element and Oxygen (KJ) | feo                  |                                                       |                      |

**Supplementary Table S3.** Optimized hyperparameters of the models.

| <b>Hyperparameters of the models</b>                    |                                                                                                   |
|---------------------------------------------------------|---------------------------------------------------------------------------------------------------|
| <b>Random Forest Classifier (RF)</b>                    | n_estimators=50,<br>random_state=42,<br>n_jobs = 5,<br>max_depth = 3                              |
| <b>Gradient Boosting Classifier (GB)</b>                | n_estimators=50,<br>max_depth=3,<br>random_state=42,<br>learning_rate = 0.01                      |
| <b>Support Vector Machine Classifier (SVM)</b>          | C = 27,<br>gamma = 0.46,<br>kernel='rbf'                                                          |
| <b>Logistic Regression (LR)</b>                         | C = 1.0,<br>max_iter = 100,<br>tol=0.0001                                                         |
| <b>Support Vector Machine Regressor (SVM Regressor)</b> | C = 27,<br>gamma = 0.46                                                                           |
| <b>Random Forest Regressor (RF Regressor)</b>           | n_estimators=50,<br>random_state=42,<br>n_jobs = 5,<br>max_depth = 3                              |
| <b>Gradient Boosting Regressor (GB Regressor)</b>       | n_estimators=50,<br>max_depth=3,<br>random_state=42,<br>learning_rate = 0.01                      |
| <b>Miceforest</b>                                       | datasets=4,<br>save_all_iterations=True,<br>random_state=42,<br>iterations=2,<br>n_estimators=100 |

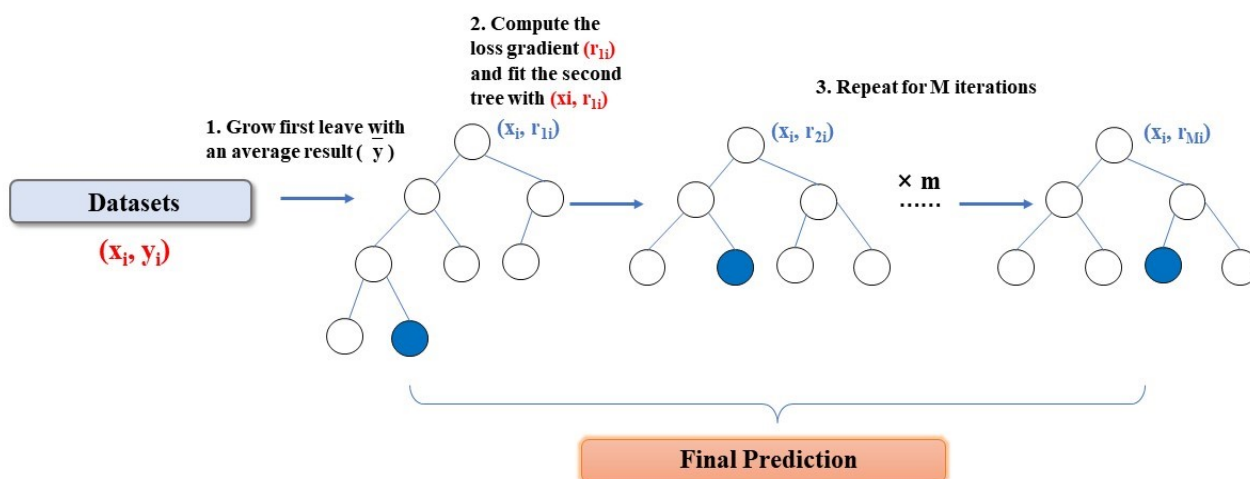

**Supplementary Figure S1.** Schematic illustration of GB classifier algorithm, where  $x_i$  denotes the value of the feature at the  $i^{\text{th}}$  sample,  $y_i$  is the capacity grade corresponding to  $x_i$  at the  $i^{\text{th}}$  sample.

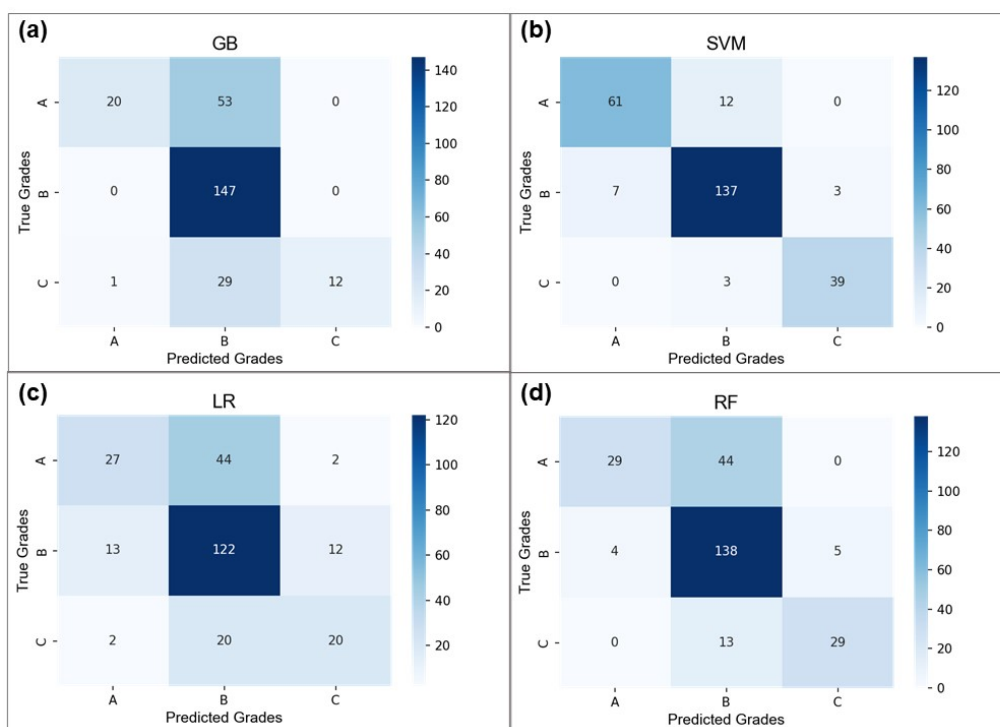

**Supplementary Figure S2.** Confusion matrix generated from (a) GB model, (b) SVM model, (c) LR model, (d) RF model during cross-validation.

**Supplementary Table S4.** Comparison of Sensitivity (TPR), Specificity (TNR), Accuracy of 4 models (LR, SVM, RF, GB) results on cross-validation.

| ML Models | Predictions on cross-validation |                   |          |
|-----------|---------------------------------|-------------------|----------|
|           | Sensitivity (TPR)               | Specificity (TNR) | Accuracy |
| LR        | 0.64                            | 0.82              | 0.64     |
| SVM       | 0.90                            | 0.95              | 0.90     |
| RF        | 0.74                            | 0.87              | 0.74     |
| GB        | 0.69                            | 0.84              | 0.69     |

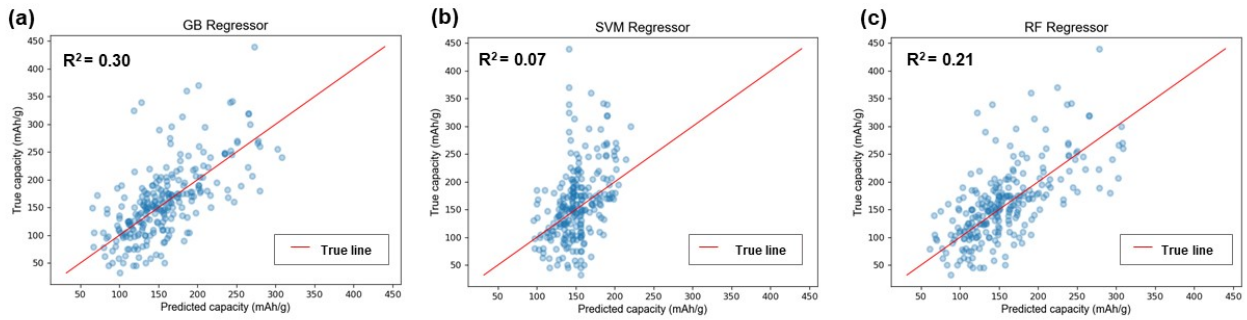

**Supplementary Figure S3.** Plot scatter of true capacity and predicted capacity of (a) GB Regressor, (b) SVM Regressor, (c) RF Regressor, where  $R^2$ , given from equation S1, was calculated to evaluate the models (where  $\hat{y}^{(i)}$  is the predicted value,  $y^{(i)}$  is the true value,  $\bar{y}$  is the average of the true values.)

$$R^2 = 1 - \frac{\sum_i (\hat{y}^{(i)} - y^{(i)})^2}{\sum_i (\bar{y} - y^{(i)})^2} \quad (\text{S1})$$

**Supplementary Table S5.** Comparison of Sensitivity (TPR), Specificity (TNR), Accuracy of GB

model's results on test set using the top 8 features and the last 8 features in Figure 5 respectively.

---

| Prediction on test set    |                   |                   |          |
|---------------------------|-------------------|-------------------|----------|
|                           | Sensitivity (TPR) | Specificity (TNR) | Accuracy |
| Using the top 8 features  | 0.74              | 0.87              | 0.74     |
| Using the last 8 features | 0.68              | 0.80              | 0.68     |

---

## References

1. Q. Cheng, S. Tang, C. Liu, Q. Lan, J. Zhao, J. Liang, J. Yan, Z. Liu and Y.-C. Cao, Preparation and electrochemical performance of  $\text{Li}_{4-x}\text{Mg}_x\text{Ti}_5\text{O}_{12}$  as anode materials for lithium-ion battery, *J. Alloys Compd.*, 2017, **722**, 229-234.
2. C. Yu, Y. Bai, D. Yan, X. Li and W. Zhang, Improved electrochemical properties of Sn-doped  $\text{TiO}_2$  nanotube as an anode material for lithium ion battery, *J. Solid State Electrochem.*, 2014, **18**, 1933-1940.
3. M. Lübke, J. Shin, P. Marchand, D. Brett, P. Shearing, Z. Liu and J. A. Darr, Highly pseudocapacitive Nb-doped  $\text{TiO}_2$  high power anodes for lithium-ion batteries, *J. Mater. Chem. A.*, 2015, **3**, 22908-22914.
4. Y. Li, S. Zhu, A. Inoue, Y. Liang, C. Chang, S. Luo and Z. Cui, Preparation of nanoporous Sn-doped  $\text{TiO}_2$  anode material for lithium-ion batteries by a simple dealloying method, *Ionics*, 2020, **26**, 4363-4372.
5. Y. Lai, W. Liu, J. Fang, F. Qin, M. Wang, F. Yu and K. Zhang, Fe-doped anatase  $\text{TiO}_2$ /carbon composite as an anode with superior reversible capacity for lithium storage, *RSC Adv.*, 2015, **5**, 93676-93683.
6. S. Huang, L. Zhang, X. Lu, L. Liu, L. Liu, X. Sun, Y. Yin, S. Oswald, Z. Zou, F. Ding and O. G.

- Schmidt, Tunable Pseudocapacitance in 3D TiO<sub>(2-δ)</sub> Nanomembranes Enabling Superior Lithium Storage Performance, *ACS Nano*, 2017, **11**, 821-830.
7. A. J. Gardecka, M. Lübke, C. F. Armer, D. Ning, M. V. Reddy, A. S. Williams, A. Lowe, Z. Liu, I. P. Parkin and J. A. Darr, Nb-doped rutile titanium dioxide nanorods for lithium-ion batteries, *Solid State Sci.*, 2018, **83**, 115-121.
  8. D. Kang, J. Li and Y. Zhang, Effect of Ni Doping Content on Phase Transition and Electrochemical Performance of TiO<sub>(2)</sub> Nanofibers Prepared by Electrospinning Applied for Lithium-Ion Battery Anodes, *Materials*, 2020, **13**, 1302.
  9. D. P. Opra, S. V. Gnedenkov, S. L. Sinebryukhov, A. B. Podgorbunsky, A. A. Sokolov, A. Y. Ustinov, V. G. Kuryavyi, V. Y. Mayorov and V. V. Zheleznov, Doping of titania with manganese for improving cycling and rate performances in lithium-ion batteries, *Chem. Phys.*, 2020, **538**, 110864.
  10. Y. Wang, M. Xu, Z. Peng and G. Zheng, Direct growth of mesoporous Sn-doped TiO<sub>2</sub> thin films on conducting substrates for lithium-ion battery anodes, *J. Mater. Chem. A.*, 2013, **1**, 13222-13226.
  11. C. T. Kacica and P. Biswas, Improved conductivity and ionic mobility in nanostructured thin films via aliovalent doping for ultra-high rate energy storage, *Nanoscale Adv.*, 2020, **2**, 2160-2169.
  12. W. Zhang, Y. Gong, N. P. Mellott, D. Liu and J. Li, Synthesis of nickel doped anatase titanate as high performance anode materials for lithium ion batteries, *J. Power Sources*, 2015, **276**, 39-45.
  13. Y. Zhang, Y. Meng, K. Zhu, H. Qiu, Y. Ju, Y. Gao, F. Du, B. Zou, G. Chen and Y. Wei, Copper-Doped Titanium Dioxide Bronze Nanowires with Superior High Rate Capability for



Lithium Ion Batteries, *ACS Appl. Mater. Interfaces*, 2016, **8** 12, 7957-7965.

14. H. Xu, M. Zeng, J. Li and F. Li, Cr-Doped TiO<sub>2</sub> Core–Shell Nanospheres with Enhanced Photocatalytic Activity and Lithium Storage Capacity, *Nano*, 2016, **11**, 1650006.
15. A. A. Kashale, A. S. Rasal, G. P. Kamble, V. H. Ingole, P. K. Dwivedi, S. J. Rajoba, L. D. Jadhav, Y.-C. Ling, J.-Y. Chang and A. V. Ghule, Biosynthesized Co-doped TiO<sub>2</sub> nanoparticles based anode for lithium-ion battery application and investigating the influence of dopant concentrations on its performance, *Compos. B. Eng.*, 2019, **167**, 44-50.
16. D. Yan, C. Yu, Y. Bai, W. Zhang, T. Chen, B. Hu, Z. Sun and L. Pan, Sn-doped TiO<sub>2</sub> nanotubes as superior anode materials for sodium ion batteries, *Chem. Comm.*, 2015, **51**, 8261-8264.
17. Y. Liu, X. Pan, W. Chen and X. Zhao, Titanate-derived Nb-doped TiO<sub>2</sub> nanoparticles displaying improved lithium storage performance, *Dalton Trans.*, 2022, **51**, 2506-2511.
18. Y. Tanaka, H. Usui, Y. Domi, M. Ohtani, K. Kobiro and H. Sakaguchi, Mesoporous Spherical Aggregates Consisted of Nb-Doped Anatase TiO<sub>2</sub> Nanoparticles for Li and Na Storage Materials, *ACS Appl. Energy Mater.*, 2019, **2**, 636-643.
19. C. Cavallo, G. Calcagno, R. P. de Carvalho, M. Sadd, B. Gonano, C. M. Araujo, A. E. C. Palmqvist and A. Matic, Effect of the Niobium Doping Concentration on the Charge Storage Mechanism of Mesoporous Anatase Beads as an Anode for High-Rate Li-Ion Batteries, *ACS Appl. Energy Mater.*, 2021, **4**, 215-225.
20. Y. Fan, X. Chen, K. Zhang, J. Rong and X. Yu, A coordinated regulation strategy to improve electronic conductivity and Li-ion transport for TiO<sub>2</sub> lithium battery anode materials, *J. Alloys Compd.*, 2021, **860**, 158282.
21. M. Lübke, I. Johnson, N. M. Makwana, D. Brett, P. Shearing, Z. Liu and J. A. Darr, High power

- TiO<sub>2</sub> and high capacity Sn-doped TiO<sub>2</sub> nanomaterial anodes for lithium-ion batteries, *J. Power Sources*, 2015, **294**, 94-102.
22. A. A. Kashale, P. K. Dwivedi, B. R. Sathe, M. V. Shelke, J. Y. Chang and A. V. Ghule, Biomass-Mediated Synthesis of Cu-Doped TiO<sub>2</sub> Nanoparticles for Improved-Performance Lithium-Ion Batteries, *ACS Omega*, 2018, **3**, 13676-13684.
23. W. Zhang, W. Zhou, J. H. Wright, Y. N. Kim, D. Liu and X. Xiao, Mn-Doped TiO<sub>2</sub> Nanosheet-Based Spheres as Anode Materials for Lithium-Ion Batteries with High Performance at Elevated Temperatures, *ACS Appl. Mater. Interfaces*, 2014, **6**, 7292-7300.
24. R. Ata ur, G. Ali, S. M. Abbas, M. Iftikhar, M. Zahid, S. Yaseen, S. Saleem, S. Haider, M. Arshad and A. Badshah, Axial expansion of Ni-doped TiO<sub>2</sub> nanorods grown on carbon nanotubes for favourable lithium-ion intercalation, *Chem. Eng. J.*, 2019, **375**, 122021.
25. Z. Ali, S. N. Cha, J. I. Sohn, I. Shakir, C. Yan, J. M. Kim and D. J. Kang, Design and evaluation of novel Zn doped mesoporous TiO<sub>2</sub> based anode material for advanced lithium ion batteries, *J. Mater. Chem.*, 2012, **22**, 17625-17629.
26. C. Zhang, Y. Qi, S. Liu, Y. Men and F. Cui, Novel mesoporous Al-doped TiO<sub>2</sub> with improved lithium storage performance, *Mater. Chem. Phys.*, 2019, **237**, 121822.
27. Z. Bi, M. P. Paranthaman, B. Guo, R. R. Unocic, H. M. Meyer III, C. A. Bridges, X.-G. Sun and S. Dai, High performance Cr, N-codoped mesoporous TiO<sub>2</sub> microspheres for lithium-ion batteries, *J. Mater. Chem. A*, 2014, **2**, 1818-1824.
28. Y. Wang, B. M. Smarsly and I. Djerdj, Niobium Doped TiO<sub>2</sub> with Mesoporosity and Its Application for Lithium Insertion, *Chem. Mater.*, 2010, **22**, 6624-6631.
29. C. Zhang, D. Shao, J. Yu, L. Zhang, X. Huang, D. Xu and X. Yu, Synthesis and electrochemical

- performance of cubic Co-doped  $\text{Li}_4\text{Ti}_5\text{O}_{12}$  anode material for high-performance lithium-ion batteries, *J. Electroanal. Chem.*, 2016, **776**, 188-192.
30. Z. Pu, Q. Lan, Y. Li, S. Liu, D. Yu and X.-J. Lv, Preparation of W-doped hierarchical porous  $\text{Li}_4\text{Ti}_5\text{O}_{12}$ /brookite nanocomposites for high rate lithium ion batteries at  $-20\text{ }^\circ\text{C}$ , *J. Power Sources*, 2019, **437**, 226890.
31. T.-Y. Chen, Y.-T. Liu, P.-C. Wu, C.-W. Hu, P.-W. Yang, L.-C. Hsu, C.-H. Lee and C.-C. Chang, Lithiation-induced crystal restructuring of hydrothermally prepared Sn/ $\text{TiO}_2$  nanocrystallite with substantially enhanced capacity and cycling performance for lithium-ion battery, *RSC Adv.*, 2016, **6**, 48620-48629.
32. J. Wang, G. Yang, L. Wang, S. Wang, W. Yan and S. Ding, In-situ fabrication of transition-metal-doped  $\text{TiO}_2$  nanofiber/nanosheet structure for high-performance Li storage, *J. Alloys Compd.*, 2019, **787**, 1110-1119.
33. Y. Zhang, Y. Meng, K. Zhu, H. Qiu, Y. Ju, Y. Gao, F. Du, B. Zou, G. Chen and Y. Wei, Copper-Doped Titanium Dioxide Bronze Nanowires with Superior High Rate Capability for Lithium Ion Batteries, *ACS Appl. Mater. Interfaces*, 2016, **8** **12**, 7957-7965.
34. D. P. Opra, S. V. Gnedenkova, S. L. Sinebryukhov, E. I. Voit, A. A. Sokolov, E. B. Modin, A. B. Podgorbunsky, Y. V. Sushkov and V. V. Zheleznov, Characterization and Electrochemical Properties of Nanostructured Zr-Doped Anatase  $\text{TiO}_2$  Tubes Synthesized by Sol–Gel Template Route, *J. Mater. Sci. Technol.*, 2017, **33**, 527-534.
35. M. Lübke, I. Johnson, N. M. Makwana, D. Brett, P. Shearing, Z. Liu and J. A. Darr, High power  $\text{TiO}_2$  and high capacity Sn-doped  $\text{TiO}_2$  nanomaterial anodes for lithium-ion batteries, *J. Power Sources*, 2015, **294**, 94-102.

36. X. Bai, W. Li, A. Wei, X. Li, L. Zhang and Z. Liu, Preparation and electrochemical properties of  $\text{Mg}^{2+}$  and  $\text{F}^-$  co-doped  $\text{Li}_4\text{Ti}_5\text{O}_{12}$  anode material for use in the lithium-ion batteries, *Electrochim. Acta*, 2016, **222**, 1045-1055.
37. Y. Ren, J. Li and J. Yu, Enhanced electrochemical performance of  $\text{TiO}_2$  by  $\text{Ti}^{3+}$  doping using a facile solvothermal method as anode materials for lithium-ion batteries, *Electrochim. Acta*, 2014, **138**, 41-47.
38. H. Li, Z. Li, Y. Cui, C. Ma and Z. Tang, Long-cycled  $\text{Li}_2\text{ZnTi}_3\text{O}_8/\text{TiO}_2$  composite anode material synthesized via a one-pot co-precipitation method for lithium ion batteries, *New J. Chem.*, 2017, **41**, 975-981.
39. T. Lan, W. Zhang, N.-L. Wu and M. Wei, Nb-Doped Rutile  $\text{TiO}_2$  Mesocrystals with Enhanced Lithium Storage Properties for Lithium Ion Battery, *Chem. Eur. J.*, 2017, **23**, 5059-5065.
40. D. P. Opra, S. V. Gnedenkov, S. L. Sinebryukhov, A. V. Gerasimenko, A. M. Ziatdinov, A. A. Sokolov, A. B. Podgorbunsky, A. Y. Ustinov, V. G. Kuryavyi, V. Y. Mayorov, I. A. Tkachenko and V. I. Sergienko, Enhancing Lithium and Sodium Storage Properties of  $\text{TiO}_2(\text{B})$  Nanobelts by Doping with Nickel and Zinc. *Nanomaterials* 2021, **11**, 1703.
